# Supplementary material for: Prevalence, Patterns, and Determinants of Artificial Intelligence Use Among Healthcare Professionals in Lagos, Nigeria: A Cross Sectional Study
Source: Research Square preprint supplement (doi:10.21203/rs.3.rs-7284091/v1), 2025-09-03
Supplement: Supplementary file 1 [file e8ebd7a853f7ad9993652a8f.docx]

**DATA COLLECTION TOOL**

**INFORMED CONSENT FORM**

**Title of Research**: Prevalence, patterns, and determinants of the use of Artificial Intelligence Among Health Care Professionals in Lagos, Nigeria

**Names and affiliation of Researchers**: The study is being conducted by Dr Chima-Oduko AA and Dr. Maduafokwa BA of the Department of Community Health, Lagos University Teaching Hospital.

**Purpose of Research:** To assess the prevalence, patterns, and determinants of the use of Artificial Intelligence among Health care professionals in Lagos, Nigeria.

**Procedure of the Research**: Semi-structured questionnaires will be self-administered to assess the prevalence, patterns, and determinants of the use of Artificial Intelligence among health care professionals.

**Potential Benefits/risks**: The research will help to ascertain the prevalence, patterns, and determinants of the use of Artificial Intelligence among HCPs. The study results will provide insight into AI usage, identify challenges, barriers, and facilitators to its use, highlight the benefits and downsides of its use, and contribute to research. No harm to any participant is anticipated as this will be a non-invasive study.

**Confidentiality:** The findings will be confidential as names and initials will not appear on the data obtained. This study cannot be linked to you in any way, and your identifier will not be used in any publication or reports from this study. Enrolment is strictly voluntary.

**Outcome of the Research**: The findings of this research will be useful in policy-making, planning, and further research.

**Statement of the person obtaining informed consent**:

I have fully explained this research to the respondent and given sufficient information, including the risks and benefits to make an informed decision.

Date.......................................... Signature................................................

**Statement of the person giving consent**:

I have read the description of the research. I understand that my participation is voluntary. I know enough about the purpose, methods, risks and benefits of the research study to judge that I may freely stop being part of this study at any time. I have received a copy of this consent form to keep for myself. I have understood the explanation of this study and having been cleared of all my questions, do hereby give my consent to be part of the study.

Date................................................. Signature...............................................

For further inquiry, please contact:

Principal Investigator

Dr Chima-Oduko AA

Department of Community Health, Lagos University Teaching Hospital.

LUTH Health Research Ethics committee: Room 107, Administrative block, Lagos University Teaching Hospital, Idi-Araba, Lagos

**DATA COLLECTION TOOL**

| The Department of Community Health, Lagos University Teaching Hospital is carrying out research to assess the prevalence, patterns and determinants of the use of Artificial Intelligence among HealthCare professionals in Lagos, Nigeria. *All information contained in this survey is strictly confidential* |
| --- |

**Section A: Sociodemographic Information**

1. Age (last birthday):

2.Sex ◻ M ◻ F

3. Tribe ◻Igbo ◻Hausa ◻Yoruba ◻Other (Specify)_________

4. Hospital employed in. ____________ Hospital/facility: The answer to this question will be provided by the respondent.

5. Educational Level: ◻Primary ◻ Secondary ◻OND ◻HND ◻Graduate

6. Specialty/department: ______________

7. Designation: ______________

8. Cadre: _______________

9. Specify type of Health Facility: ◻ Primary eg PHCs, clinics. ◻ Secondary (e.g General Hospital) ◻ Tertiary (e.g Teaching Hospital, Federal Medical centre)

**Section B: Knowledge of Artificial Intelligence**

10. How familiar are you with the concept of Artificial Intelligence (AI) in healthcare?

◻ Very familiar Somewhat familiar Not familiar

11. Which of the following statements accurately describe AI?

AI refers to machines that can perform tasks that typically require human intelligence.

◻ Yes ◻ No ◻ Don’t know

12. Have you taken any courses or workshops specifically focused on Artificial Intelligence? ◻ Yes ◻ No

13. AI involves the use of algorithms to analyze data and make decisions.

◻ Yes ◻ No ◻ Don’t know

14. AI enables computers to learn and improve their performance without explicit Knowledge ◻ Yes ◻ No ◻ Don’t know

15. AI can only perform simple, predefined tasks. ◻ Yes ◻ No ◻ Don’t know

16. What are the primary objectives of Artificial Intelligence?

a. Automate tasks and processes ◻ Yes ◻ No ◻ Don’t know

b. Replicate human emotions ◻ Yes ◻ No ◻ Don’t know

c. Solve complex problems ◻ Yes ◻ No ◻ Don’t know

d. Solve complex problems ◻ Yes ◻ No ◻ Don’t know

e. Replace humans ◻ Yes ◻ No ◻ Don’t know

f. None of the above ◻ Yes ◻ No ◻ Don’t know

Answer “true” or “false” to the following questions

17. Machine Learning is a subset of Artificial Intelligence that enables machines to learn from data and improve their performance without explicit programming.

◻ True ◻ False

18. AI is exclusively limited to robots and physical entities that mimic human actions and behaviours. ◻ True ◻ False

19. AI can analyse large datasets and identify patterns, trends, and insights that can be used for decision-making and predictions. ◻ True ◻ False

20. Robotics is an application of AI that involves designing and building physical machines capable of autonomous actions. ◻ True ◻ False

21. Facial recognition technology is an AI application that can identify and verify individuals based on their facial features. ◻ True ◻ False

22. Virtual Assistants like Siri, Alexa, or Google Assistant use AI to understand and respond to voice commands and perform various tasks. ◻ True ◻ False

23. AI has the ability to demonstrate creativity and generate original artistic works, such as music compositions and artworks. ◻ True ◻ False

| **Section C: Use of Artificial intelligence in Healthcare Profession** | | | | | |
| --- | --- | --- | --- | --- | --- |
| **24.** Do you use Artificial intelligence | ◻ Yes | ◻No |  |  |  |
| **25.**How do you primarily access AI technologies? | ◻ Smartphones | ◻Laptops/Computers | ◻ Smart speakers or home assistants | ◻ Other  (please specify) |  |
| **26.** Does your healthcare facility currently utilize AI technologies in its operations? | ◻yes | ◻No | ◻Not sure |  |  |
| **27.** Have you used AI technologies to assist you in discharging your duties? | ◻ Yes | ◻No |  |  |  |
| **28.** If yes,how often do you use the following AI technologies in your professional life? |  |  |  |  |  |
| Virtual assistants e.g., Siri, Alexa, Google Assistant | ◻Rarely/ never | ◻Occasionally | ◻ Sometimes | ◻ Often | ◻ Always |
| AI-assisted medical image diagnosis | ◻Rarely/ never | ◻Occasionally | ◻ Sometimes | ◻ Often | ◻ Always |
| AI-assisted medical image analysis | ◻Rarely/ never | ◻Occasionally | ◻ Sometimes | ◻ Often | ◻ Always |
| AI-powered wearable devices | ◻Rarely/ never | ◻Occasionally | ◻ Sometimes | ◻ Often | ◻ Always |
| AI-assisted diagnosis | ◻Rarely/ never | ◻Occasionally | ◻ Sometimes | ◻ Often | ◻ Always |
| AI-assisted drug prescription | ◻Rarely/ never | ◻Occasionally | ◻ Sometimes | ◻ Often | ◻ Always |
| AI assisted Telemedicine |  |  |  |  |  |
| AI-powered language translation tools | ◻Rarely/ never | ◻Occasionally | ◻ Sometimes | ◻ Often | ◻ Always |
| AI writing assistance | ◻Rarely/ never | ◻Occasionally | ◻ Sometimes | ◻ Often | ◻ Always |
| AI-powered search engines | ◻Rarely/ never | ◻Occasionally | ◻ Sometimes | ◻ Often | ◻ Always |
| AI-powered Chatbots for content creation | ◻Rarely/ never | ◻Occasionally | ◻ Sometimes | ◻ Often | ◻ Always |
| ◻ Other (please specify) |  |  |  |  |  |
| **29**. How do you perceive the impact of AI on the efficiency of healthcare delivery in your facility? | Very negative | Negative | Neutral | Positive | Very positive |
| **30.** Have you used AI technologies to assist you in your research? | ◻ Yes | ◻No |  |  |  |
| **31.** If yes, in what ways have AI technologies aided your research? (Select all that apply) | ◻ AI-powered research and literature search  - | ◻ AI-based educational resources or platforms | ◻AI-driven data analysis and visualization | ◻AI-powered language translation for academic content | ◻AI writing assistance  ◻ Other (please specify) _____________ |
| **32.**Do you believe AI technologies have positively impacted your performance as a health care professional? | ◻ Yes | ◻No |  |  |  |

| **Section D: Determinants of Artificial Intelligence Use** | | | |  |
| --- | --- | --- | --- | --- |
| **31.** **What factors influenced your decision to use AI technologies? (Select all that apply)** | Convenience | Efficiency in completing task | Improved learning or educational outcomes | Curiosity about AI technology |
|  | Peer influence | Availability of AI tools of platforms | Access to the internet | Availability of data |
|  | Personal interest in AI | Other  (please specify) |  |  |
| **32.** **What are the potential concerns or challenges that may prevent you from using AI technologies? (Select all that apply)** | Privacy and data security concerns | Lack of trust in AI algorithms | Cannot afford data | I don’t own a phone or computer or other relevant Gadgets |
|  | - Fear of job displacement by AI  - | Difficulty in understanding or using AI technologies. | Cultural or ethical concerns | Other (please specify)  ________ |
